# Supplementary material
Source: PubMed Central journal article supplement (PMC3182503)

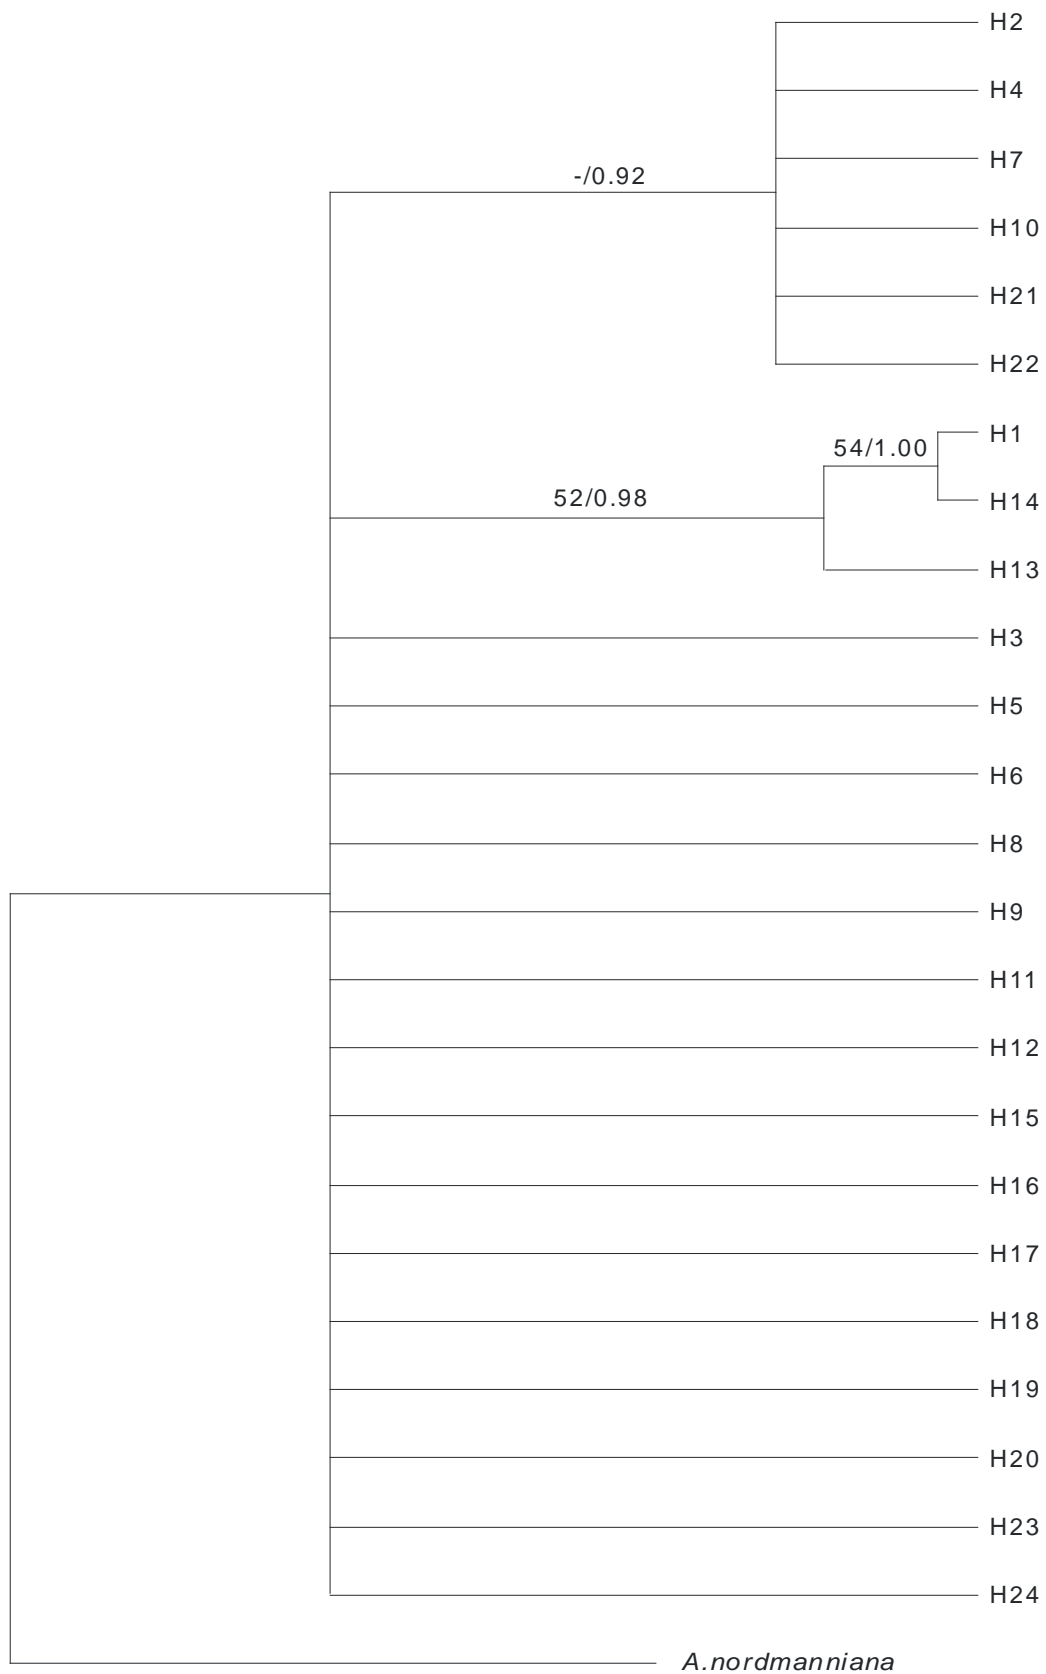

Supplement: hdy201122x1.pdf [file hdy201122x1.pdf]

*Abies chensiensis*

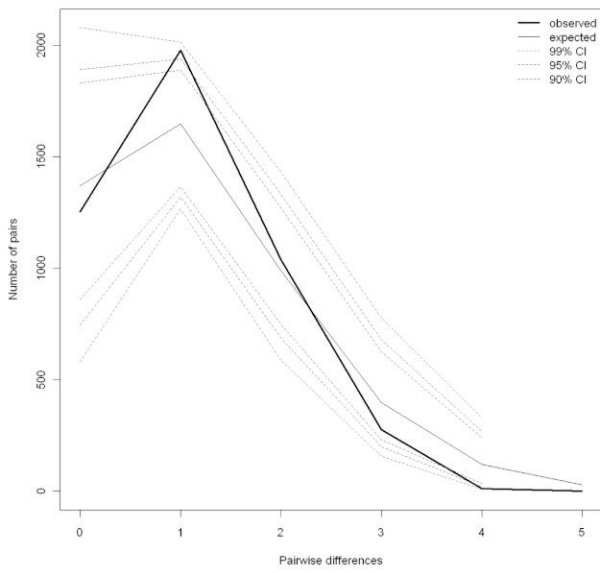

*Abies fargesii*

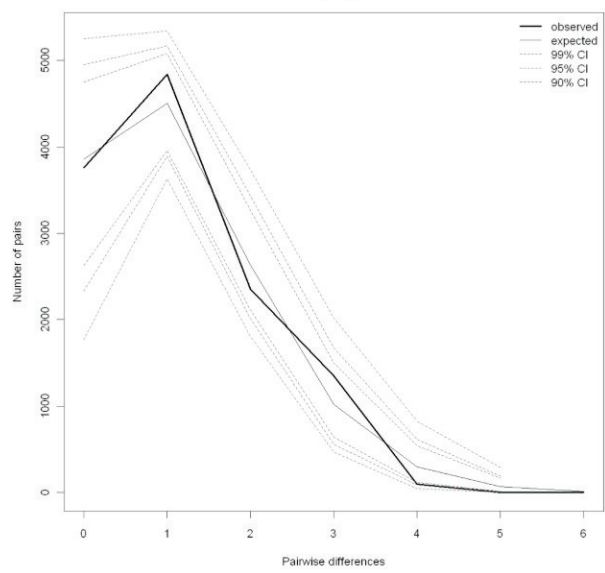

North-central group

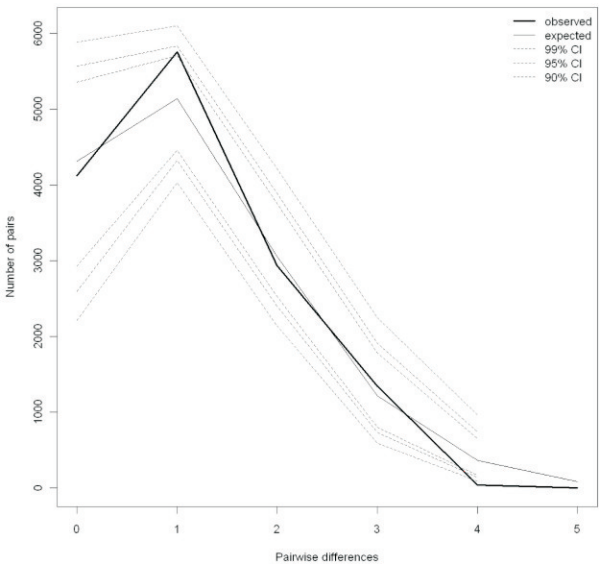

Western group

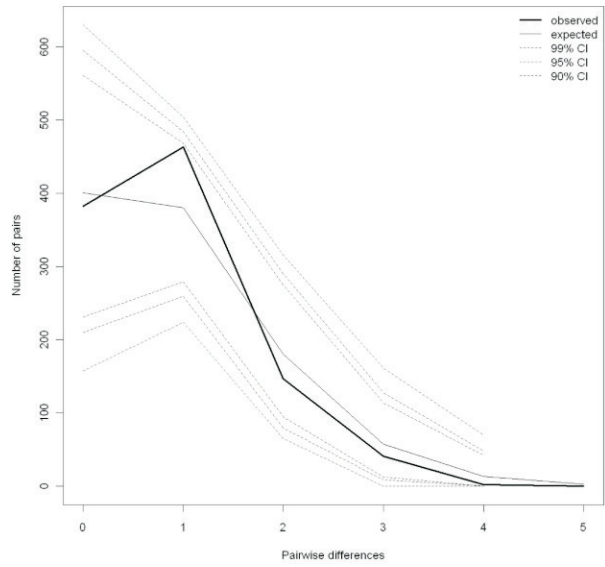

Southern group

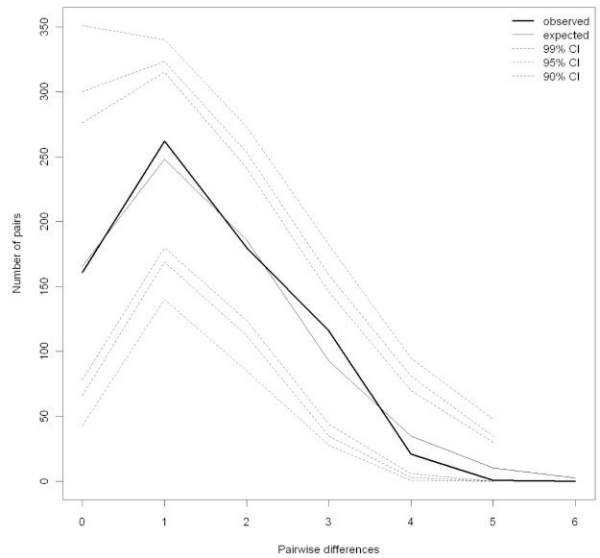

The total

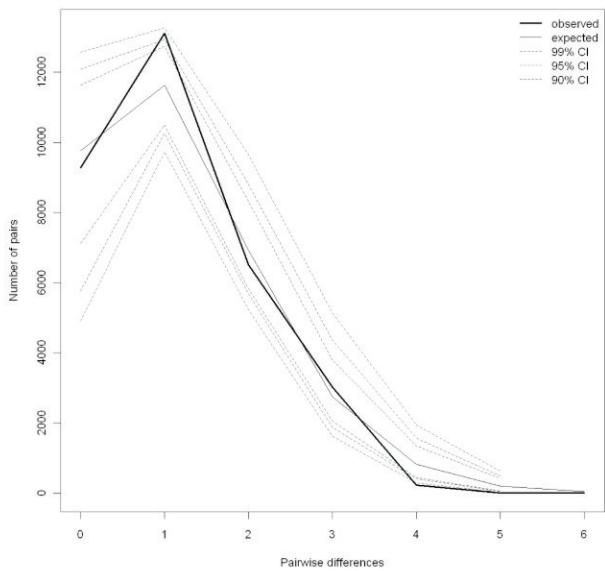

Supplement: hdy201122x2.pdf [file hdy201122x2.pdf]

*Abies chensiensis*

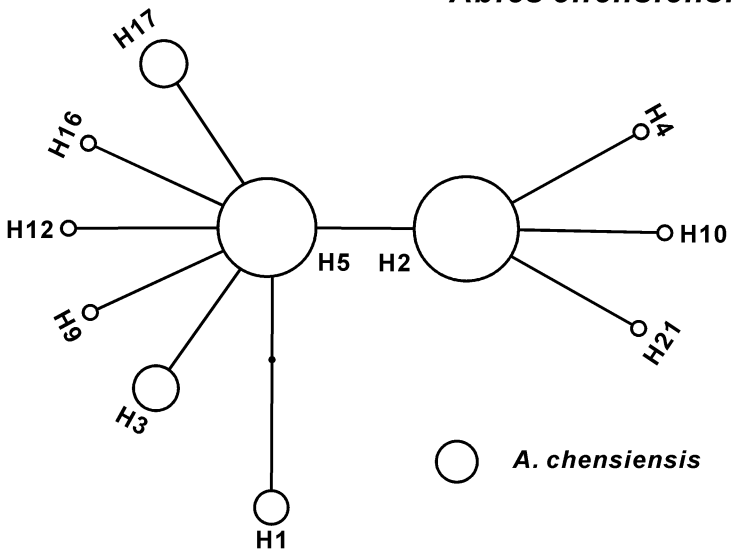

*Abies fargesii*

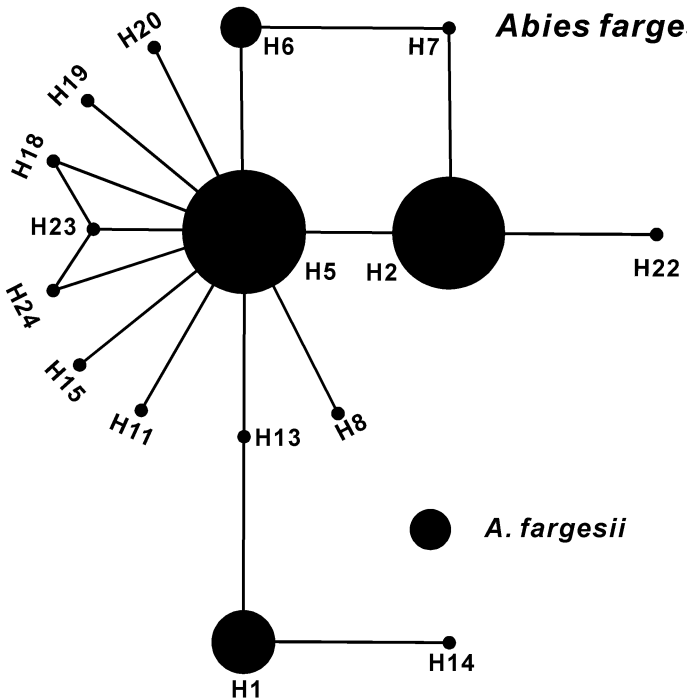

### North-central group

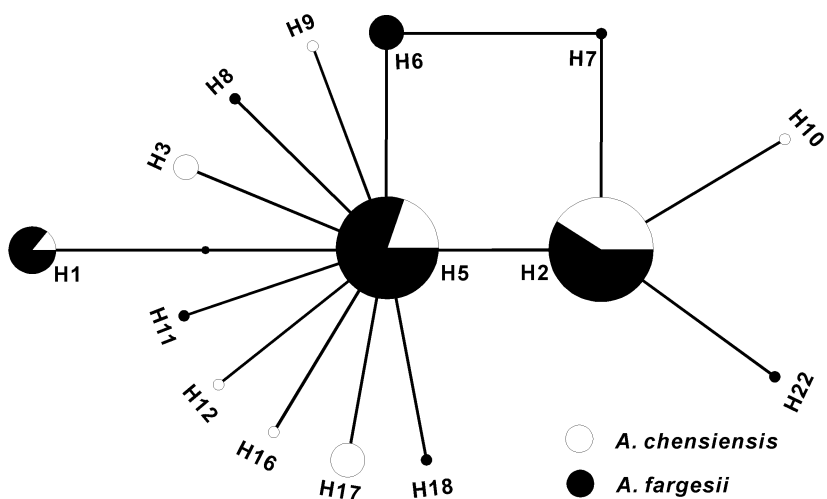

### Western group

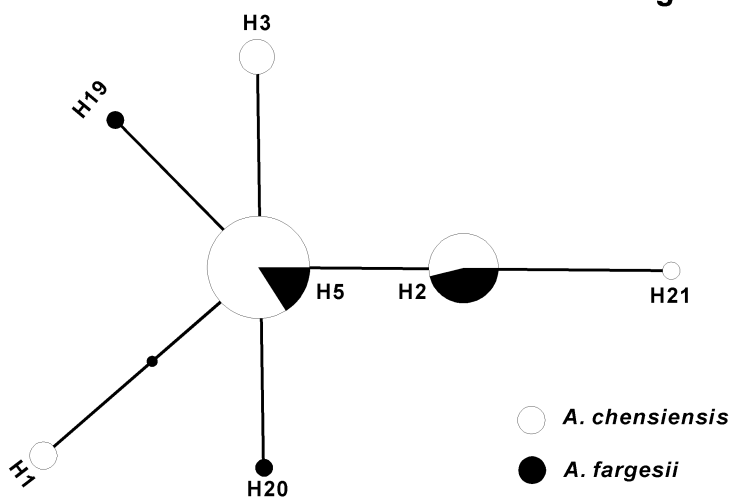

### Southern group

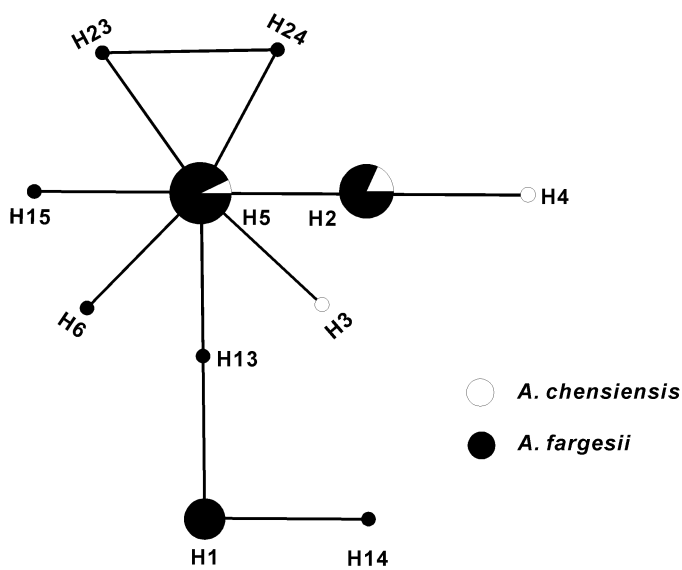

Supplement: hdy201122x3.pdf [file hdy201122x3.pdf]
